# Supplementary material for: Comprehensive Analysis of the CDPK-SnRK Superfamily Genes in Chinese Cabbage and Its Evolutionary Implications in Plants
Source: PubMed Central journal article supplement (PMC5301275; doi:10.3389/fpls.2017.00162), 2017-02-10
Supplement: Presentation1.pdf [file Presentation1.pdf]

# Comprehensive Analysis of the CDPK-SnRK Superfamily Genes in Chinese Cabbage and Its Evolutionary Implications in Plants

Peng Wu<sup>1</sup>, Wenli Wang<sup>1</sup>, Weike Duan<sup>1,2</sup>, Ying Li<sup>1</sup>, Xilin Hou<sup>1\*</sup>

<sup>1</sup>State Key Laboratory of Crop Genetics and Germplasm Enhancement/Key Laboratory of Biology and Germplasm Enhancement of Horticultural Crops in East China, Ministry of Agriculture, Nanjing Agricultural University, Nanjing 210095, China

<sup>2</sup>School of Life Science and Food Engineering, Huaiyin Institute of Technology, Huaian, China

\*To whom correspondence should be addressed: hxl@njau.edu.cn

Tel.: +86 025 8439 5917

**Figure S1** Schematic diagram of amino acid motifs and gene structures of *BrCDPK-SnRK* genes in *Arabidopsis* and *B. rapa*.

**Figure S2. Alignments of *A. thaliana* and *B.rapa* CPK, CRK, PEPRK, PPCK and SnRK proteins.** Conservations and consensus were demonstrated under the alignments.

**Figure S3.** The phylogenetic trees of the *BrCDPK-SnRK* genes from 13 Angiospermae.

**Figure S4 (a)** The phylogenetic tree of the *BrCDPK-SnRK* genes from 13 Angiospermae, one Pteridophyta, one Bryophyta and two Chlorophyta species. **(b)** The genetic distance among clades *CPK*, *CRK*, *PEPRK*, *PPCK* and *SnRK*.

**Figure S5 Information of *CPK*, *CRK*, *PEPRK*, *PPCK* gene family clades in *Brassica rapa*, *Arabidopsis thaliana*, *Carica papaya*, *Populus trichocarpa*, *Vitis vinifera* and *Amborella trichopoda*.** The  $\alpha$ ,  $\beta$ ,  $\gamma$ , and salicoid duplications and the Brassica-specific triplication are indicated on the branches of the trees according to the Plant Genome Duplication Database. To classify these *CPK*, *CRK*, *PEPRK*, *PPCK* genes, phylogenetic trees with *CPK*, *CRK*, *PEPRK*,

*PPCK* genes for each of the five species by maximum likelihood using MEGA5, respectively.

**Figure S6 Information of *SnRK* gene family clades in *Brassica rapa*, *Arabidopsis thaliana*, *Carica papaya*, *Populus trichocarpa*, *Vitis vinifera* and *Amborella trichopoda*.** The  $\alpha$ ,  $\beta$ ,  $\gamma$ , and salicoid duplications and the Brassica-specific triplication are indicated on the branches of the trees according to the Plant Genome Duplication Database. To classify these *SnRK* genes, phylogenetic trees with *SnRK* genes for each of the five species by maximum likelihood using MEGA5, respectively.

**Figure S7. Phylogenetic analysis of the *CPK* gene family in angiosperms.** Protein sequences were aligned by ClustalW2. A phylogenetic tree was constructed by maximum likelihood (ML) and bootstrap values were calculated with 1000 replications using MEGA5.2. Gene losses are possibly indicated by X.  $\alpha$ ,  $\beta$ , and  $\gamma$  duplications as well as the Brassica triplication are indicated. green pentagons indicate the Brassica triplication.

**Fig. S8. Expression patterns analysis of the *CDPK-SnRK* genes in *Arabidopsis thaliana* and *Brassica rapa*.** Expression patterns of the *CPK*, *CRK*, *PEPRK*, *PPCK* and *SnRK* in five tissues, including the root, stem, leaf, flower and silique. Gene expression was determined using the AtGenExpress Visualization Tool and *B. rapa* RNA-Seq data. The bar at the bottom of each heat map represents the relative expression values.

**Fig. S9. Interaction network of *CDPK-SnRK* genes in between *Arabidopsis thaliana* and *B.rapa*.** (a,b,c,d) Specific protein interactions of *CPK*, *SnRK* in *A. thaliana* and *B.rapa* were constructed using STRING (Search Tool for the Retrieval of Interacting Genes/Proteins; <http://string-db.org/>).
